# Supplementary material
Source: PubMed Central journal article supplement (PMC4565761)
Supplement: NIHMS708016-supplement-Supp_TableS1-S2.pdf [file NIHMS708016-supplement-Supp_TableS1-S2.pdf]

Supplementary Table 1: Genotyping data for 3 SNP and 3 microsatellite markers at the *JPH3* locus in HDL2 positive individuals and families

| Individual | Origin            | <i>JPH3</i><br>expansion | Marker      |             |             |             |                     |             |                     |             |                    |             |             |             |
|------------|-------------------|--------------------------|-------------|-------------|-------------|-------------|---------------------|-------------|---------------------|-------------|--------------------|-------------|-------------|-------------|
|            |                   |                          | D16S3074    |             | D16S3048    |             | (SNP1)<br>rs2544638 |             | (SNP2)<br>rs3849254 |             | (SNP3)<br>rs918368 |             | D16S413     |             |
|            |                   |                          | Allele<br>1 | Allele<br>2 | Allele<br>1 | Allele<br>2 | Allele<br>1         | Allele<br>2 | Allele<br>1         | Allele<br>2 | Allele<br>1        | Allele<br>2 | Allele<br>1 | Allele<br>2 |
| HC49       | SA Black          | +                        | 16          | 23          | 25          | 24          | C                   | C           | T                   | C           | C                  | T           | 14          | 25          |
| HC51       | SA Black          | +                        | 12          | 23          | 25          | 22          | C                   | C           | T                   | C           | C                  | C           | 20          | 24          |
| HC71       | SA Black          | +                        | 12          | 12          | 25          | 24          | C                   | C           | T                   | C           | C                  | C           | 20          | 23          |
| HC77       | SA Black          | +                        | 12          | 16          | 25          | 24          | C                   | C           | T                   | T           | C                  | T           | 20          | 26          |
| HC86       | SA Black          | +                        | 12          | 16          | 25          | 20          | C                   | C           | T                   | C           | C                  | C           | 20          | 17          |
| HC95       | SA Black          | +                        | 12          | 18          | 25          | 26          | C                   | C           | T                   | C           | C                  | C           | 20          | 17          |
| HC144-1    | SA Black          | +                        | 12          | 14          | 25          | 14          | C                   | C           | T                   | C           | C                  | C           | 20          | 25          |
| HC144 -2   | SA Black          | +                        | 12          | 17          | 25          | 25          | C                   | C           | T                   | C           | C                  | C           | 20          | 24          |
| HC165      | SA Black          | +                        | 12          | 17          | 25          | 23          | C                   | C           | T                   | T           | C                  | C           | 20          | 21          |
| HC168      | SA Black          | +                        | 12          | 16          | 25          | 21          | C                   | C           | T                   | T           | C                  | C           | 20          | 23          |
| HC175      | SA Black          | +                        | 12          | 11          | 25          | 20          | C                   | C           | T                   | T           | C                  | C           | 24          | 26          |
| HC188      | SA Black          | +                        | 12          | 16          | 25          | 20          | C                   | C           | T                   | C           | C                  | C           | 20          | 23          |
| HC201      | SA Black          | +                        | 12          | 16          | 25          | 25          | C                   | C           | T                   | C           | C                  | C           | 20          | 28          |
| HC236      | SA Black          | +                        | 12          | 18          | 25          | 20          | C                   | C           | T                   | T           | C                  | T           | 20          | 24          |
| HC254      | SA Black          | +                        | 12          | 21          | 25          | 23          | C                   | C           | T                   | T           | C                  | T           | 20          | 20          |
| HC224      | SA Black          | +                        | 14          | 21          | 25          | 20          | C                   | C           | T                   | C           | C                  | C           | 20          | 20          |
| HC233      | SA Black          | +                        | 20          | 21          | 25          | 25          | C                   | C           | T                   | T           | C                  | T           | 20          | 21          |
| HC178-1    | SA Mixed Ancestry | +                        | 12          | 16          | 25          | 21          | C                   | C           | T                   | T           | C                  | T           | 20          | 24          |
| HC178-2    | SA Mixed Ancestry | +                        | 12          | 16          | 25          | 24          | C                   | C           | T                   | C           | C                  | C           | 20          | 25          |
| HC178-3    | SA Mixed Ancestry | +                        | 12          | 17          | 25          | 23          | C                   | C           | T                   | T           | C                  | T           | 20          | 20          |
| HC191      | SA Mixed Ancestry | +                        | 12          | 23          | 25          | 23          | C                   | C           | T                   | T           | C                  | C           | 20          | 22          |
| HC193      | SA Mixed Ancestry | +                        | 12          | 21          | 25          | 21          | C                   | C           | T                   | C           | C                  | C           | 23          | 28          |
| 55-593     | African American  | +                        | 12          | 20          | 25          | 26          | C                   | C           | T                   | T           | C                  | C           | 22          | 24          |
| 870-4376   | African American  | +                        | 12          | 11          | 26          | 15          | NR                  | NR          | T                   | T           | C                  | C           | 22          | 24          |
| 870-4934   | African American  | +                        | 12          | 18          | 26          | 23          | NR                  | NR          | T                   | T           | NR                 | NR          | 22          | 24          |
| 870-4935   | African American  | +                        | 12          | 11          | 26          | 13          | C                   | A           | T                   | T           | NR                 | NR          | 22          | 24          |
| 870-5011   | African American  | +                        | 12          | 18          | 26          | 23          | C                   | C           | T                   | T           | C                  | C           | 22          | 24          |
| 870-5504   | African American  | -                        | 12          | 16          | 25          | 25          | A                   | C           | T                   | T           | NR                 | NR          | 22          | 24          |
| 870-5790   | African American  | +                        | 12          | 11          | 26          | 23          | C                   | A           | T                   | T           | NR                 | NR          | 22          | 24          |
| 870-5792   | African American  | +                        | 12          | 11          | 26          | 23          | C                   | A           | T                   | T           | NR                 | NR          | 22          | 24          |
| 870-5793   | African American  | +                        | 12          | 11          | 26          | 23          | C                   | A           | T                   | T           | C                  | C           | 22          | 24          |
| 870-5798   | African American  | +                        | 12          | 12          | 26          | 21          | C                   | C           | T                   | C           | C                  | C           | 22          | 23          |
| 870-5800   | African American  | -                        | 16          | 24          | 21          | 25          | A                   | C           | NR                  | NR          | NR                 | NR          | 23          | 26          |
| 870-5802   | African American  | +                        | 12          | 11          | 26          | 23          | C                   | A           | NR                  | NR          | NR                 | NR          | 22          | 24          |
| 870-5804   | African American  | +                        | 12          | 16          | 26          | 24          | C                   | A           | T                   | T           | NR                 | NR          | 22          | 24          |
| 870-5856   | African American  | -                        | 16          | 24          | 21          | 25          | C                   | C           | T                   | T           | C                  | C           | 23          | 26          |

SA, South African  
NR, No result

Supplementary Table 1: Genotyping data for 3 SNP and 3 microsatellite markers at the *JPH3* locus in HDL2 positive individuals and families (continued)

| Individual | Origin             | <i>JPH3</i> expansion | Marker   |          |          |          |                     |          |                     |          |                    |          |          |          |
|------------|--------------------|-----------------------|----------|----------|----------|----------|---------------------|----------|---------------------|----------|--------------------|----------|----------|----------|
|            |                    |                       | D16S3074 |          | D16S3048 |          | (SNP1)<br>rs2544638 |          | (SNP2)<br>rs3849254 |          | (SNP3)<br>rs918368 |          | D16S413  |          |
|            |                    |                       | Allele 1 | Allele 2 | Allele 1 | Allele 2 | Allele 1            | Allele 2 | Allele 1            | Allele 2 | Allele 1           | Allele 2 | Allele 1 | Allele 2 |
| 1760-6253  | African American   | +                     | 12       | 16       | 26       | 23       | NR                  | NR       | T                   | T        | C                  | T        | 20       | 22       |
| 1465-5619  | African American   | +                     | 12       | 16       | 25       | 23       | C                   | C        | T                   | C        | C                  | C        | 21       | 21       |
| 1465-5999  | African American   | +                     | 12       | 22       | 25       | 26       | C                   | C        | T                   | C        | C                  | C        | 21       | 27       |
| 1856-6875  | African American   | +                     | 12       | 14       | 25       | 22       | C                   | C        | T                   | C        | C                  | C        | 23       | 23       |
| 1848-6859  | African American   | +                     | 12       | 11       | 25       | 21       | C                   | C        | T                   | C        | C                  | C        | 23       | 25       |
| 1827-6413  | African American   | +                     | 12       | 17       | 25       | 26       | C                   | C        | T                   | T        | NR                 | NR       | 22       | 22       |
| 1881-6917  | African American   | +                     | 12       | 22       | 26       | 24       | C                   | C        | T                   | T        | C                  | C        | 22       | 23       |
| 1705-6170  | Other <sup>1</sup> | +                     | 16       | 22       | 26       | 23       | C                   | C        | T                   | T        | V                  | V        | 22       | 24       |
| 1705-6219  | Other <sup>1</sup> | +                     | 16       | 21       | 26       | 13       | NR                  | NR       | T                   | T        | C                  | C        | 22       | 27       |
| 1769-6286  | Mexican            | +                     | 16       | 21       | 25       | 21       | C                   | C        | T                   | T        | C                  | C        | 23       | 21       |
| 1769-6264  | Mexican            | +                     | 16       | 21       | 25       | 25       | C                   | C        | NR                  | NR       | C                  | C        | 23       | 20       |
| 1769-6265  | Mexican            | -                     | 16       | 23       | 21       | 24       | C                   | C        | T                   | T        | C                  | C        | 22       | 23       |
| 1769-6266  | Mexican            | -                     | 21       | 23       | 23       | 25       | C                   | C        | T                   | C        | C                  | C        | 21       | 23       |
| 1769-6267  | Mexican            | -                     | 16       | 21       | 21       | 25       | T                   | T        | T                   | T        | C                  | C        | 22       | 23       |
| 1769-6268  | Mexican            | -                     | 16       | 24       | 21       | 23       | C                   | C        | T                   | T        | C                  | C        | 21       | 23       |
| 1769-6287  | Mexican            | -                     | 16       | 23       | 19       | 23       | NR                  | NR       | T                   | T        | C                  | T        | 22       | 24       |
| 1886-6927  | Mexican            | +                     | 12       | 21       | 25       | 21       | C                   | C        | T                   | T        | C                  | C        | 21       | 23       |
| 2289-001   | Moroccan           | +                     | 11       | 23       | 26       | 21       | C                   | T        | T                   | T        | T                  | T        | 16       | 23       |
| 571-005    | French West Indian | +                     | 22       | 17       | 21       | 21       | C                   | T        | T                   | T        | C                  | C        | 20       | 22       |
| 571-002    | French West Indian | -                     | 12       | 17       | 20       | 21       | C                   | T        | T                   | T        | C                  | C        | 21       | 22       |

<sup>1</sup>European American Indian African

NR, No result

Supplementary Table 2: Genotyping Data for 3 SNP and 3 microsatellite markers at the *JPH3* locus in South African Black unaffected individuals

| Individuals | Marker   |          |          |          |                     |          |                     |          |                    |          |          |          |
|-------------|----------|----------|----------|----------|---------------------|----------|---------------------|----------|--------------------|----------|----------|----------|
|             | D16S3074 |          | D16S3048 |          | (SNP1)<br>rs2544638 |          | (SNP2)<br>rs3849254 |          | (SNP3)<br>rs918368 |          | D16S413  |          |
|             | Allele 1 | Allele 2 | Allele 1 | Allele 2 | Allele 1            | Allele 2 | Allele 1            | Allele 2 | Allele 1           | Allele 2 | Allele 1 | Allele 2 |
| 1           | 11       | 16       | 23       | 26       | C                   | C        | T                   | T        | T                  | T        | 21       | 29       |
| 2           | 12       | 15       | 24       | 24       | C                   | C        | C                   | T        | C                  | C        | 17       | 24       |
| 3           | 12       | 14       | 23       | 26       | C                   | C        | C                   | T        | T                  | C        | 22       | 24       |
| 4           | 14       | 21       | 20       | 23       | C                   | C        | C                   | T        | T                  | C        | 16       | 23       |
| 5           | 16       | 16       | 24       | 25       | C                   | C        | C                   | T        | T                  | C        | 22       | 25       |
| 6           | 14       | 21       | 20       | 21       | C                   | C        | T                   | T        | T                  | C        | 16       | 21       |
| 7           | 20       | 22       | 22       | 22       | C                   | C        | C                   | T        | T                  | T        | 21       | 22       |
| 8           | 12       | 16       | 13       | 23       | C                   | C        | C                   | T        | T                  | C        | 25       | 34       |
| 9           | 15       | 16       | 20       | 26       | C                   | C        | C                   | C        | C                  | C        | 20       | 25       |
| 10          | 16       | 20       | 21       | 23       | C                   | C        | C                   | C        | T                  | C        | 24       | 26       |
| 11          | 12       | 16       | 22       | 25       | C                   | C        | T                   | T        | C                  | C        | 23       | 24       |
| 12          | 19       | 20       | 21       | 25       | C                   | C        | T                   | T        | C                  | C        | 22       | 24       |
| 13          | NR       | NR       | 13       | 21       | C                   | C        | C                   | T        | C                  | C        | 10       | 24       |
| 14          | 15       | 20       | 20       | 25       | C                   | C        | T                   | T        | T                  | T        | 20       | 24       |
| 15          | 17       | 20       | 17       | 25       | C                   | C        | T                   | T        | T                  | C        | 24       | 24       |
| 16          | 11       | 18       | 20       | 23       | C                   | A        | C                   | T        | C                  | C        | 16       | 23       |
| 17          | 11       | 21       | 16       | 26       | C                   | C        | C                   | T        | C                  | C        | 25       | 27       |
| 18          | 11       | 11       | 21       | 23       | C                   | C        | C                   | T        | T                  | C        | 24       | 25       |
| 19          | 16       | 16       | 19       | 25       | C                   | C        | T                   | T        | T                  | T        | 18       | 21       |
| 20          | 16       | 17       | 20       | 24       | C                   | C        | C                   | C        | C                  | C        | 23       | 24       |
| 21          | 16       | 17       | 20       | 21       | C                   | C        | C                   | T        | C                  | C        | 20       | 24       |
| 22          | 16       | 16       | 20       | 24       | C                   | C        | C                   | T        | C                  | C        | 21       | 23       |
| 23          | 15       | 16       | 25       | 26       | C                   | C        | NR                  | NR       | T                  | C        | 24       | 26       |
| 24          | 17       | 20       | 21       | 21       | C                   | A        | C                   | T        | C                  | C        | 20       | 22       |
| 25          | 14       | 16       | 26       | 27       | C                   | C        | C                   | C        | C                  | C        | 17       | 21       |
| 26          | 16       | 17       | 20       | 21       | NR                  | NR       | NR                  | NR       | NR                 | NR       | 23       | 24       |
| 27          | 11       | 17       | 25       | 25       | NR                  | NR       | NR                  | NR       | NR                 | NR       | 25       | 27       |
| 28          | 11       | 16       | 25       | 25       | NR                  | NR       | NR                  | NR       | NR                 | NR       | 26       | 28       |
| 29          | 15       | 16       | 19       | 24       | NR                  | NR       | NR                  | NR       | NR                 | NR       | 22       | 22       |
| 30          | 17       | 18       | 21       | 23       | NR                  | NR       | NR                  | NR       | NR                 | NR       | 10       | 24       |
| 31          | 12       | 16       | 13       | 19       | NR                  | NR       | NR                  | NR       | NR                 | NR       | 21       | 21       |
| 32          | 16       | 20       | 21       | 25       | NR                  | NR       | NR                  | NR       | NR                 | NR       | 21       | 26       |

NR, No result
